# Supplementary material for: Role of mutations in the cellular internalization of amyloidogenic light chains into cardiomyocytes
Source: PubMed Central journal article supplement — Sci Rep. 2013 Feb 18;3:1278. doi: 10.1038/srep01278 (PMC3575045; doi:10.1038/srep01278), 2013-02-18
Supplement: srep01278-s1.pdf [file srep01278-s1.pdf]

## Supplementary information

*“Role of mutations in the cellular internalization of amyloidogenic light chains into cardiomyocytes”*

*R. T. Levinson, O. O. Olatoye, E. G. Randles, K. G. Howell, A. C. DiCostanzo, and M. Ramirez-Alvarado.*

**Scientific Reports**

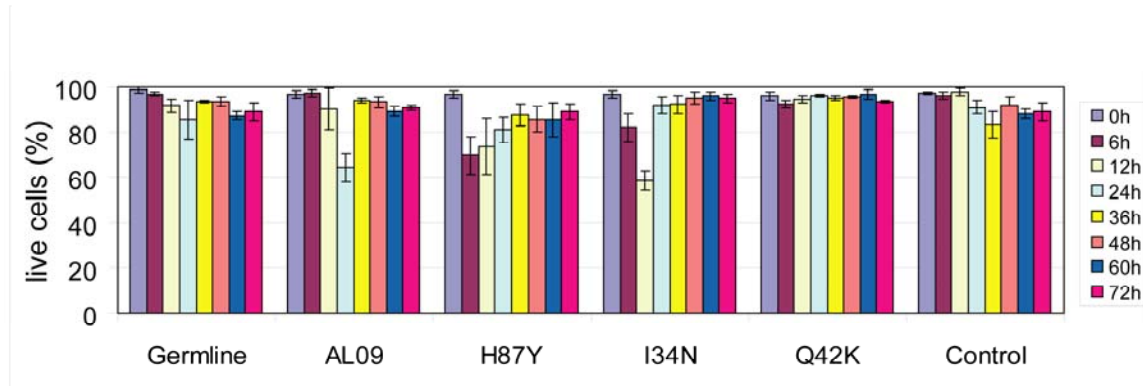

**Supplementary Fig. S1.** Cell viability in the presence of the different proteins over the course of 72 hours followed by Trypan Blue staining. 1 $\mu$ M protein in PBS was added to cells. Error bars are standard deviation from average of three different replicates within protein samples at time point.

**Supplementary Table S1. Quantification of the number of cells that internalized protein through the course of the experiment.** Cells were counted from the experiments represented in figures 2, 5, and 6.

| Protein      | Total number of cells (24 h) | Number of cells with internalized protein (AVG±STD %) |
|--------------|------------------------------|-------------------------------------------------------|
| OG-κI O18/O8 | 186                          | 138 (78.1±28.6 %)                                     |
| OG-AL-09     | 84                           | 65 (80.7±19.4 %)                                      |
| OG-H87Y      | 147                          | 98 (69.7±26.4 %)                                      |
| OG-I34N      | 171                          | 132 (79.3±10.8 %)                                     |
| OG-Q42K      | 129                          | 74 (53.5±28.9 %)                                      |
| -----        | -----                        | -----                                                 |
| Protein      | Total number of cells (48 h) | Number of cells with internalized protein (AVG±STD %) |
| OG-κI O18/O8 | 174                          | 109 (61±21.9 %)                                       |
| OG-AL-09     | 144                          | 136 (94.9±3.3 %)                                      |
| OG-H87Y      | 94                           | 61 (63.9±16.5 %)                                      |
| OG-I34N      | 74                           | 41 (54.08±23.7 %)                                     |
| OG-Q42K      | 102                          | 83 (80.1%±12.3 %)                                     |
| -----        | -----                        | -----                                                 |
| Protein      | Total number of cells (72 h) | Number of cells with internalized protein (AVG±STD %) |
| OG-κI O18/O8 | 133                          | 89 (68.3±13.6 %)                                      |
| OG-AL-09     | 173                          | 162 (93.8±5.0 %)                                      |
| OG-H87Y      | 165                          | 136 (81.1±17.7 %)                                     |
| OG-I34N      | 120                          | 98 (81.4±18.7 %)                                      |
| OG-Q42K      | 159                          | 141 (87.8±9.8 %)                                      |
